# Supplementary material for: Cost-Effectiveness Analysis of Rivaroxaban Plus Aspirin Compared with Aspirin Alone in Patients with Coronary and Peripheral Artery Diseases in Italy
Source: PubMed Central journal article supplement — Clin Drug Investig. 2021 Mar 16;41(5):459–68. doi: 10.1007/s40261-021-01023-8 (PMC8149345; doi:10.1007/s40261-021-01023-8), 2021-03-16
Supplement: 40261_2021_1023_MOESM1_ESM.pdf [file 40261_2021_1023_MOESM1_ESM.pdf]

## *Supplementary material*

**Journal: Clinical Drug Investigation**

# **Cost-effectiveness analysis of rivaroxaban plus aspirin compared with aspirin alone in patients with coronary and peripheral artery diseases in Italy**

**Authors:** Pietro Ferrara <sup>1,2</sup> \*, Paolo A. Cortesi <sup>1,2</sup>, Danilo Di Laura <sup>1</sup>, Aldo P. Maggioni <sup>3,4</sup>, Lorenzo G. Mantovani <sup>1,2</sup>

### **Affiliations:**

1. Center for Public Health Research, University of Milano – Bicocca, Monza, Italy
2. Value-based Healthcare Unit, IRCCS MultiMedica, Sesto San Giovanni, Italy
3. ANMCO Research Center, Firenze, Italy
4. Maria Cecilia Hospital, GVM Care&Research, Cotignola (RA), Italy

### **\* Corresponding author:**

Pietro Ferrara, MD

Center for Public Health Research, University of Milan - Bicocca

Via Cadore 48, I-20900 Monza, Italy

Phone +39 (0)39-2333097/8

Email: p.ferrara5@campus.unimib.it

**Table S1. Model Inputs**

|                                                                              | <b>Base case value</b> | <b>Range used in the DSA</b><br>[lower case; higher case] | <b>Distribution used in the PSA</b><br>(distribution parameters) | <b>Source</b>                                                                       |
|------------------------------------------------------------------------------|------------------------|-----------------------------------------------------------|------------------------------------------------------------------|-------------------------------------------------------------------------------------|
| <b>HRs (rivaroxaban 2.5mg/bid plus ASA vs. ASA alone)</b>                    |                        |                                                           |                                                                  |                                                                                     |
| MI                                                                           | 0.86                   | [0.70;1.05]                                               | Lognormal (-0.1508, 0.1034)                                      | COMPASS<br>95% CI for DSA<br>Lognormal distribution<br>for PSA                      |
| IS                                                                           | 0.51                   | [0.38;0.69]                                               | Lognormal (-0.6733;0.1522)                                       |                                                                                     |
| ICH                                                                          | 1.16                   | [0.67;2.00]                                               | Lognormal (0.1484;0.2790)                                        |                                                                                     |
| CV death                                                                     | 0.78                   | [0.64;0.95]                                               | Lognormal (-0.2485;0.1008)                                       |                                                                                     |
| Fatal bleeding                                                               | 1.49                   | [0.67;3.30]                                               | Lognormal (0.3988;0.4067)                                        |                                                                                     |
| <b>ASA other events probabilities (3-month probability)</b>                  |                        |                                                           |                                                                  |                                                                                     |
| Major extracranial non-fatal<br>modified ISTH bleeding events                | 0.00217                | [0.00184;0.00253]                                         | Beta (153;70232)                                                 | COMPASS<br>95% CI of a Beta<br>distribution for DSA<br>Beta distribution for<br>PSA |
| ALI                                                                          | 0.00064                | [0.00047;0.00084]                                         | Beta (45;70340)                                                  |                                                                                     |
| Minor amputation                                                             | 0.00043                | [0.00029;0.00059]                                         | Beta (30;70355)                                                  |                                                                                     |
| Major amputation                                                             | 0.00037                | [0.00024;0.00052]                                         | Beta (26;70359)                                                  |                                                                                     |
| VTE                                                                          | 0.00061                | [0.00044;0.00081]                                         | Beta (43;70342)                                                  |                                                                                     |
| <b>HRs for other events for rivaroxaban 2.5mg/bid plus ASA vs. ASA alone</b> |                        |                                                           |                                                                  |                                                                                     |
| ALI                                                                          | 0.55                   | [0.32;0.93]                                               | Lognormal (-0.5978;0.2722)                                       | COMPASS<br>95% CI for DSA<br>Lognormal distribution<br>for PSA                      |
| Minor amputation                                                             | 0.65                   | [0.35;1.2]                                                | Lognormal (-0.4308;0.3143)                                       |                                                                                     |
| Major amputation                                                             | 0.57                   | [0.30;1.09]                                               | Lognormal (-0.5621;0.3291)                                       |                                                                                     |
| VTE                                                                          | 0.61                   | [0.37;1.00]                                               | Lognormal (-0.4943;0.2536)                                       |                                                                                     |
| Major extracranial non-fatal bleeds                                          | 1.79                   | [1.46;2.19]                                               | Lognormal (0.5822;0.1034)                                        |                                                                                     |
| <b>Medication costs (daily cost)</b>                                         |                        |                                                           |                                                                  |                                                                                     |
| ASA                                                                          | €0.05                  | Not included                                              | Not included                                                     |                                                                                     |

|                                                  | <b>Base case value</b> | <b>Range used in the DSA</b><br>[lower case; higher case] | <b>Distribution used in the PSA</b><br>(distribution parameters) | <b>Source</b>                                                                                                                           |
|--------------------------------------------------|------------------------|-----------------------------------------------------------|------------------------------------------------------------------|-----------------------------------------------------------------------------------------------------------------------------------------|
| Rivaroxaban                                      | €2.09                  | Not included                                              | Not included                                                     | Formulary of the Italian Agency of Medicine (AIFA)                                                                                      |
| <b>Health state costs (per 3-month cycle)</b>    |                        |                                                           |                                                                  |                                                                                                                                         |
| Event-free                                       | €0.0                   | Not included                                              | Not included                                                     |                                                                                                                                         |
| Acute MI                                         | €7544.70               | [5281.30;9808.10]                                         | Gamma (7544.70;496.95)                                           | DRG, Italian diagnosis-related group tariff; Mantovani et al. [1]; Lucchese et al. [2]<br>+/- 30% for DSA<br>Gamma distribution for PSA |
| Post-acute MI                                    | €979.80                | [685.09;1273.70]                                          | Gamma (979.80;41.05)                                             |                                                                                                                                         |
| Acute IS                                         | €6164.50               | [4315.20;8013.90]                                         | Gamma (6164.50;1213.77)                                          |                                                                                                                                         |
| Post-IS                                          | €1855.50               | [1298.90;2412.20]                                         | Gamma (1855.50;237.20)                                           |                                                                                                                                         |
| Acute ICH                                        | €3891.00               | [2723.70;5058.30]                                         | Gamma (3891.00;2241.80)                                          |                                                                                                                                         |
| <b>Health event costs for the 3 first months</b> |                        |                                                           |                                                                  |                                                                                                                                         |
| ALI                                              | €2199.00               | [1539.30;2858.70]                                         | Gamma (2199.00;534.13)                                           | DRG, Italian diagnosis-related group tariff; Marone et al. [3].<br>+/- 30% for DSA<br>Gamma distribution for PSA                        |
| Minor amputation                                 | €6056.00               | [4239.20;7872.80]                                         | Gamma (6056.00;793.60)                                           |                                                                                                                                         |
| Major amputation                                 | €13947.70              | [9763.40;18132.00]                                        | Gamma (13947.70;2199.32)                                         |                                                                                                                                         |
| VTE                                              | €2315.00               | [1620.50;3009.50]                                         | Gamma (2315.00;154.70)                                           |                                                                                                                                         |
| Major non-fatal extracranial bleeds              | €2091.00               | [1463.70;2718.30]                                         | Gamma (2091.00;123.84)                                           |                                                                                                                                         |
| <b>Utilities</b>                                 |                        |                                                           |                                                                  |                                                                                                                                         |
| Event-free                                       | 0.835                  | [0.752;0.919]                                             | Beta (0.835;0.050)                                               | COMPASS EQ-5D<br>+/- 10% for DSA<br>Beta distribution for PSA                                                                           |
| Acute MI                                         | 0.784                  | [0.706;0.862]                                             | Beta (0.784;0.043)                                               |                                                                                                                                         |
| Post MI                                          | 0.807                  | [0.726;0.888]                                             | Beta (0.807;0.047)                                               |                                                                                                                                         |
| Acute IS                                         | 0.647                  | [0.582;0.712]                                             | Beta (0.647;0.037)                                               |                                                                                                                                         |
| Post IS                                          | 0.743                  | [0.669;0.817]                                             | Beta (0.743;0.044)                                               |                                                                                                                                         |
| Acute ICH                                        | 0.702                  | [0.632;0.772]                                             | Beta (0.702;0.037)                                               |                                                                                                                                         |

|                                                                                                                                                                                                                                                                                                                                                                                                                                            | <b>Base case value</b> | <b>Range used in the DSA</b><br>[lower case; higher case] | <b>Distribution used in the PSA</b><br>(distribution parameters) | <b>Source</b>                                                                     |
|--------------------------------------------------------------------------------------------------------------------------------------------------------------------------------------------------------------------------------------------------------------------------------------------------------------------------------------------------------------------------------------------------------------------------------------------|------------------------|-----------------------------------------------------------|------------------------------------------------------------------|-----------------------------------------------------------------------------------|
| Post ICH                                                                                                                                                                                                                                                                                                                                                                                                                                   | 0.755                  | [0.680;0.831]                                             | Beta (0.755;0.044)                                               |                                                                                   |
| <b>Utility decrements</b>                                                                                                                                                                                                                                                                                                                                                                                                                  |                        |                                                           |                                                                  |                                                                                   |
| ALI (1 cycle)                                                                                                                                                                                                                                                                                                                                                                                                                              | -0.157                 | [-0.141;-0.173]                                           | -Beta (-0.157;0.009)                                             | COMPASS EQ-5D<br>+/- 10% for DSA<br>Inverted beta (-beta)<br>distribution for PSA |
| Minor amputation (each cycle)                                                                                                                                                                                                                                                                                                                                                                                                              | -0.100                 | [-0.090;-0.110]                                           | -Beta (-0.100;0.006)                                             |                                                                                   |
| Major amputation (each cycle)                                                                                                                                                                                                                                                                                                                                                                                                              | -0.175                 | [-0.158;-0.193]                                           | -Beta (-0.175;0.013)                                             |                                                                                   |
| VTE (1 cycle)                                                                                                                                                                                                                                                                                                                                                                                                                              | -0.111                 | [-0.100;-0.122]                                           | -Beta (-0.111;0.006)                                             |                                                                                   |
| Major extracranial non-fatal bleeds<br>(1 cycle)                                                                                                                                                                                                                                                                                                                                                                                           | -0.019                 | [-0.017;-0.021]                                           | -Beta (-0.019;0.001)                                             |                                                                                   |
| <i>DSA</i> , deterministic sensitivity analyses; <i>PSA</i> , probabilistic sensitivity analyses; <i>ASA</i> , acetylsalicylic acid; <i>HR</i> , hazard ratio; <i>CI</i> , confidence interval; <i>CV</i> , cardiovascular; <i>ALI</i> , acute limb ischaemia; <i>ICH</i> , intracranial haemorrhage; <i>IS</i> , ischaemic stroke; <i>MI</i> , myocardial infarction; <i>VTE</i> , venous thromboembolism; <i>EQ-5D</i> , EuroQol-5D tool |                        |                                                           |                                                                  |                                                                                   |

Figure S1. Cost-effectiveness results plane

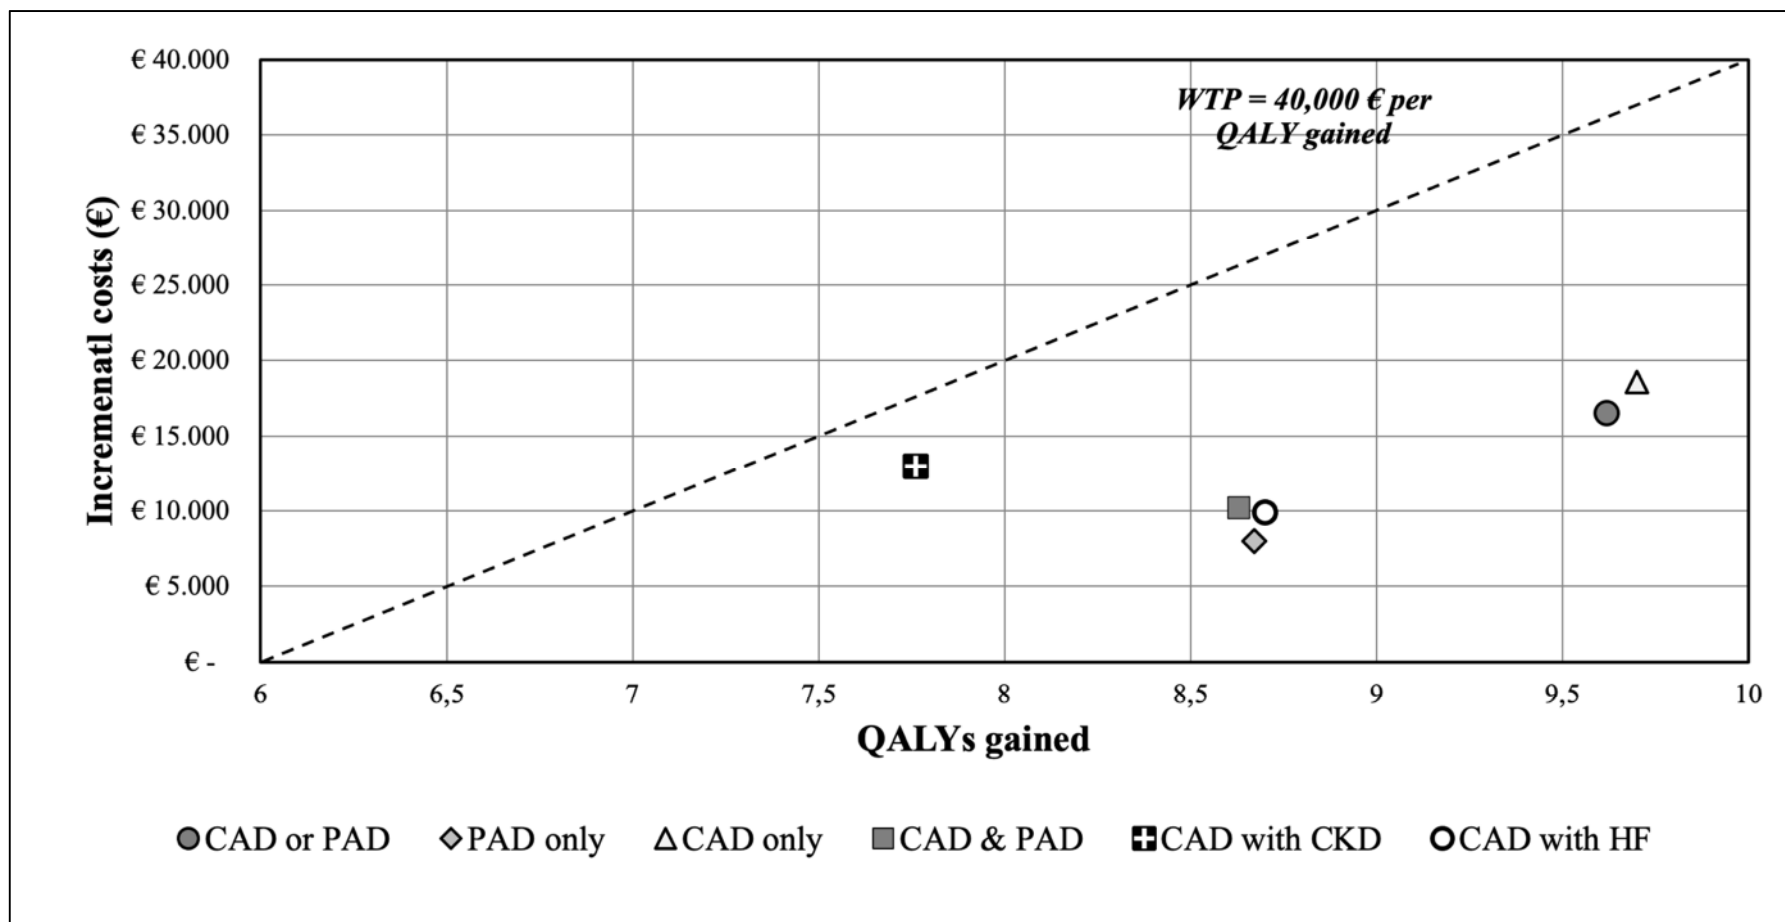

CAD, coronary artery disease; PAD, peripheral arterial disease; CKD, chronic kidney disease; HF, heart failure; QALYs, quality-adjusted life years; WTP; willingness to pay threshold.

## References:

1. Mantovani LG, Fornari C, Madotto F, et al. Burden of acute myocardial infarction. *International Journal of Cardiology* 2011;150(1):111-2.
2. Lucchese M, Borisenko O, Mantovani LG, et al. Cost-Utility Analysis of Bariatric Surgery in Italy: Results of Decision-Analytic Modelling. *Obes Facts*. 2017; 10(3): 261-72.
3. Marone EM, Cozzolino P, Ciampichini R, et al. Peripheral arterial disease in diabetic patients: a long-term population-based study on occurrence, outcomes and cost. *J Cardiovasc Surg (Torino)*. 2018;59(4):572-579.
